# Supplementary material
Source: ML conference proceedings conference paper supplement (https://openaccess.thecvf.com/content/ICCV2021/html/Zhang_End-to-End_Urban_Driving_ICCV_2021_paper.html)
Supplement: Supplementary file 1 [file Zhang_End-to-End_Urban_Driving_ICCV_2021_supplemental.zip]

Archive with 4 entries (4 files):
- 01766-supp_video_compressed.mp4
- __MACOSX/._01766-supp_video_compressed.mp4
- 01766-supp.pdf
- __MACOSX/._01766-supp.pdf
